# The effect of stimulus choice on an EEG-based objective measure of speech intelligibility

**Eline Verschueren<sup>a,\*</sup>, Jonas Vanthornhout<sup>a</sup> and Tom Francart<sup>a</sup>**

*<sup>a</sup>Research Group Experimental Oto-rhino-laryngology (ExpORL), Department of  
Neurosciences, KU Leuven - University of Leuven, 3000 Leuven, Belgium*

Correspondence\*:

Eline Verschueren

Herestraat 49, bus 721, 3000 Leuven, Belgium

fax: +3216330478

Tel: +3216329452

[eline.verschueren@kuleuven.be](mailto:eline.verschueren@kuleuven.be)

# 1 ABSTRACT

2 **Objectives** Recently an objective measure of speech intelligibility, based on brain  
3 responses derived from the electroencephalogram (EEG), has been developed using  
4 isolated Matrix sentences as a stimulus. We investigated whether this objective measure  
5 of speech intelligibility can also be used with natural speech as a stimulus, as this would  
6 be beneficial for clinical applications.

7 **Design** We recorded the EEG in 19 normal-hearing participants while they listened to  
8 two types of stimuli: Matrix sentences and a natural story. Each stimulus was presented  
9 at different levels of speech intelligibility by adding speech weighted noise. Speech  
10 intelligibility was assessed in two ways for both stimuli: (1) behaviorally and (2) objectively  
11 by reconstructing the speech envelope from the EEG using a linear decoder and correlating  
12 it with the acoustic envelope. We also calculated temporal response functions (TRFs)  
13 to investigate the temporal characteristics of the brain responses in the EEG channels  
14 covering different brain areas.

15 **Results** For both stimulus types the correlation between the speech envelope and  
16 the reconstructed envelope increased with increasing speech intelligibility. In addition,  
17 correlations were higher for the natural story than for the Matrix sentences. Similar to the  
18 linear decoder analysis, TRF amplitudes increased with increasing speech intelligibility for  
19 both stimuli. Remarkable is that although speech intelligibility remained unchanged, neural  
20 speech processing was affected by the addition of a small amount of noise: TRF amplitudes  
21 across the entire scalp decreased between 0 to 150 ms, while amplitudes between 150 to  
22 200 ms increased. TRF latency changes in function of speech intelligibility appeared to  
23 be stimulus specific: The latency of the prominent negative peak in the early responses  
24 (50-300 ms) increased with increasing speech intelligibility for the Matrix sentences, but  
25 remained unchanged for the natural story.

26     **Conclusions** These results show (1) the feasibility of natural speech as a stimulus for the  
 27     objective measure of speech intelligibility, (2) that neural tracking of speech is enhanced  
 28     using a natural story compared to Matrix sentences and (3) that noise and the stimulus  
 29     type can change the temporal characteristics of the brain responses. These results might  
 30     reflect the integration of incoming acoustic features and top-down information, suggesting  
 31     that the choice of the stimulus has to be considered based on the intended purpose of the  
 32     measurement.

# 1 INTRODUCTION

In current clinical practice speech intelligibility is measured behaviorally by asking the listeners to recall the words or sentences they heard. By doing so, not only the function of the auditory periphery is measured, but also working memory, language knowledge, cognition and speech production. When measuring speech intelligibility to evaluate the function of a hearing aid, it can be desirable to evaluate the auditory periphery without these extra factors. In addition, the required active participation of the patient can make these measurements challenging or even impossible because of poor attention or motivation, especially in small children.

To overcome these challenges an objective measure of speech intelligibility, where no input from the patient is required, would be of great benefit. Previous studies have shown that the slowly varying speech envelope is essential for speech intelligibility (Shannon et al., 1995), and that it can be reconstructed from brain responses using electroencephalography (EEG) or magnetoencephalography (Luo and Poeppel, 2007; Aiken and Picton, 2008; Ding and Simon, 2011). Correlating the reconstructed envelope from the brain response with the real acoustic envelope, results in a measure of neural envelope tracking, which is related to speech intelligibility (Luo and Poeppel, 2007; Ding et al., 2014; Millman et al., 2015; Molinaro and Lizarazu, 2017; Vanthornhout et al., 2018; Lotzov and Parra, 2019; Lesenfants et al., 2019).

Vanthornhout et al. (2018) and Lesenfants et al. (2019) demonstrated the application of this measure of neural envelope tracking in an objective measure of speech intelligibility using isolated Matrix sentences as a stimulus. In their studies the same Matrix sentences were used during a standardized behavioral recall experiment and an EEG measurement, enabling direct comparison of speech intelligibility to envelope tracking. However, for the purpose of clinical applications, the use of isolated sentences may be sub-optimal. Sentences do not reflect everyday communication where syllable, word and sentence rate are less controlled and more semantic top-down processing is involved. Therefore, an objective measure of speech intelligibility based on fully natural speech would (1) overcome the patient-related challenges linked to attention and motivation (2) and allow

intelligibility measurements of any speech fragment, which is impossible today using behavioral measurements but may relate better to everyday communication.

In this study we investigated whether the objective measure of speech intelligibility by Vanthornhout et al. (2018) using Matrix sentences can also be conducted with natural running speech, such as a narrated story. We hypothesized that a difference in neural envelope tracking between the two stimuli may be related to the interactive process of speech processing. Speech intelligibility namely relies on the active integration of two incoming information streams (Hickok and Poeppel, 2007; Anderson et al., 2018): (1) the bottom-up stream that processes the acoustic features through the auditory pathway until the auditory cortex and (2) the top-down stream originating in different brain regions. We hypothesized that if neural envelope tracking is mainly a feed-forward acoustic process, results for Matrix sentences will be enhanced compared to the story because of the rigid syllable, word and sentence rate reflected in the speech envelope of the Matrix sentences. If, on the other hand, neural envelope tracking captures the interaction between the incoming acoustic speech stream and top-down information, results for the story will be enhanced because of, e.g., increased semantic processing (Di Liberto et al., 2018; Broderick et al., 2018) and attention (Kerlin et al., 2010; Ding and Simon, 2012; Mesgarani and Chang, 2012; Vanthornhout et al., 2019).

## 2 MATERIAL AND METHODS

### 2.1 Participants

Nineteen participants aged between 18 and 28 years (3 men and 16 women) took part in the experiment after providing informed consent. Participants had Flemish as their mother tongue and were all normal-hearing, confirmed with pure tone audiometry (thresholds  $\leq 25$  dB HL at all octave frequencies from 125 Hz to 8 kHz). The study was approved by the Medical Ethics Committee UZ Leuven / Research (KU Leuven) with reference S57102. All participants were unpaid volunteers.

## 2.2 Auditory stimuli

During the experiment participants listened to three different stimuli: (1) isolated Matrix sentences, (2) a natural story and (3) another story used to train the linear decoder on.

### 2.2.1 Matrix sentences

Flemish Matrix sentences contain 5 words spoken by a female speaker and have a fixed syntactic structure of ‘proper name-verb-numeral-adjective-object’, for example, ‘Sofie sees ten blue socks’ with a speech rate of 4.1 syllables/second, 2.5 words/second and 0.5 sentences/second. Each category of words has 10 alternatives and each sentence consists of a random combination of these alternatives which induces a rigid and artificial speech rate and reduces semantic context to a bare minimum. These sentences are gathered into standardized lists of 20 sentences. Speech was fixed at a level of 60 dBA and the noise level varied across trials. We used speech weighted noise (SWN) which has the long-term-average spectrum of the stimulus and therefore results in optimal energetic masking. Matrix sentences are a validated speech material to measure speech intelligibility which allows us to directly compare EEG results with speech intelligibility, similar to Vanthornhout et al. (2018) and Lesenfants et al. (2019). However, Matrix sentences have a rigid speech rate and lack semantic information, resulting in an artificial speech stimulus not representative for everyday communication.

### 2.2.2 Natural story

The natural story we used is ‘De Wilde Zwanen’, written by Hans Christian Andersen and narrated in Flemish by Katrien Devos (female speaker) with a speech rate of approximately 3.5 syllables/second, 2.5 words/second and 0.2 sentences/second. Speech was fixed at a level of 60 dBA and the noise level of the SWN varied across trials. The main differences between the Matrix sentences (2.2.1) and fully natural speech such as this narrated story are:

1. *Prosody*: Matrix sentences are part of a standardized speech material where every word is spoken at the same intensity, while the story is naturally spoken with intensity variations as a consequence.
2. *Speech rate*: Matrix sentences have a rigid syllable, word and sentence rate, while the story has a naturally varying speech rate because of different word and sentence lengths.
3. *Semantic context*: Matrix sentences are a random combination of words, minimizing the use of semantic context. The story, on the other hand, is coherent speech where the use of top-down processing is triggered, e.g., knowledge about time, space and characters.
4. *Lexical prediction*: The permutations of the words are different in each Matrix sentence, but the words themselves become more familiar to the participants during the experiment, in contrast to the story.

### 2.2.3 Decoder story

A children's story, 'Milan', written and narrated in Flemish by Stijn Vranken (male speaker), was presented to the participants with a speech rate of 3.7 syllables/second, 2.6 words/second and 0.3 sentences/second. This story is 14 minutes long and was presented at a level of 60 dBA without noise. The purpose of this story was to have an independent continuous stimulus without background noise to train a linear decoder on (Vanthornhout et al., 2018) to reconstruct the speech envelope from the EEG.

## 2.3 Behavioral experiment

Speech intelligibility was measured behaviorally in order to compare envelope tracking results in terms of speech intelligibility. We need to measure speech intelligibility for both stimuli separately because they differ in content and acoustic parameters (speaker, speech rate, intonation). Adding a similar level of background noise will therefore not result in a similar level of speech intelligibility (Decruy et al., 2018).

Before the EEG experiment we conducted a standardized Matrix test. This standardized test starts with 2 training lists followed by 3 testing lists of 20 sentences at different Signal-to-Noise Ratios (SNR): -9.5; -6.5 and -3.5 dB SNR. Participants had to recall the sentence they heard. By counting the correctly recalled words, a percentage correct per presented SNR was calculated. Next, a psychometric function was fitted on the data points, similar to what is done in clinical practice. To measure speech intelligibility for the story, we cannot ask the participants to recall every word, instead we used a rating method during the EEG experiment. Participants were asked to rate their speech intelligibility with the following question: 'Which percentage of the words did you understand?' at the presented SNRs (-12.5; -9.5; -6.5; -3.5; -0.5 and 2.5 dB SNR). In addition to the recall procedure for the Matrix sentences before the EEG experiment, we also asked 9 of the 19 participants to rate their speech intelligibility for the Matrix sentences during the EEG, similar to the story.

## 2.4 EEG experiment

Ten participants started the EEG experiment by listening to Matrix sentences followed by the natural story. The remaining 9 participants did this in the reversed order. The decoder story was presented in between. The natural story was cut in 7 equal parts of approximately 4 minutes long, which we presented in chronological order. The first part was always presented in silence to optimize comprehension of the storyline. The following 6 parts were presented at 6 different SNRs in random order: -12.5; -9.5; -6.5; -3.5; -0.5 and 2.5 dB SNR. The Matrix sentences were concatenated into 7 lists of 40 sentences with a silent gap between the sentences randomly varying between 0.8 and 1.2 seconds. Each 2-minute trial, containing 40 sentences at a particular SNR, was presented twice to analyze test-retest reliability. The SNRs were the same SNRs as used for the story, also in random order. To maximize attention and keep the participants motivated, questions were asked about each SNR trial, for example, 'What happened after sunset?' (story) or 'Which colors of boats were mentioned?' (Matrix sentences). The answers were not used for further analysis. After the question, the participants were asked to rate their speech intelligibility with the following question: 'Which percentage of the words did you understand?' as mentioned in section 2.3.



## 2.5 Signal processing

In this study we measured neural envelope tracking and linked this to speech intelligibility and stimulus type (natural story versus isolated Matrix sentences). Neural envelope tracking was calculated in two ways: We correlated the acoustic speech envelope (2.5.1) with the speech envelope reconstructed from the EEG responses (2.5.2) with the help of a linear decoder. Secondly, we calculated temporal response functions (TRFs) to investigate the temporal characteristics of the brain responses in the EEG channels covering the scalp (2.5.3).

### 2.5.1 Acoustic envelope

The acoustic speech envelope was extracted from the stimulus according to Biesmans et al. (2017), using a gammatone filterbank followed by a power law. We used a filterbank containing 28 channels spaced by 1 equivalent rectangular bandwidth with center frequencies from 50 Hz until 5000 Hz. The absolute value of each sample in each channel was raised to the power of 0.6. All 28 channel envelopes were averaged which resulted in one single envelope. As a next step, the acoustic speech envelope was band-pass filtered, similar to the EEG signal, in the delta (0.5-4 Hz) or theta (4-8 Hz) frequency band with a Chebyshev filter with 80 dB attenuation at 10% outside the passband. Only these low frequencies were further processed, because they contain the information of interest of the slowly varying speech envelope.

### 2.5.2 Envelope reconstruction

As a first step the EEG data was downsampled from 8192 Hz to 256 Hz to reduce processing time and referenced to an average of the electrodes. Next, EEG artefact rejection was done using a multi-channel Wiener filter (MWF) (Somers et al., 2018). the MWF was calculated on the long decoder story without noise and applied on the shorter Matrix and coherent story SNR trials. After artefact rejection, the signal was bandpass filtered, similar to the acoustic speech envelope and the sample rate was further decreased from 256 Hz to 128 Hz. A schematic overview is shown in Figure 1.

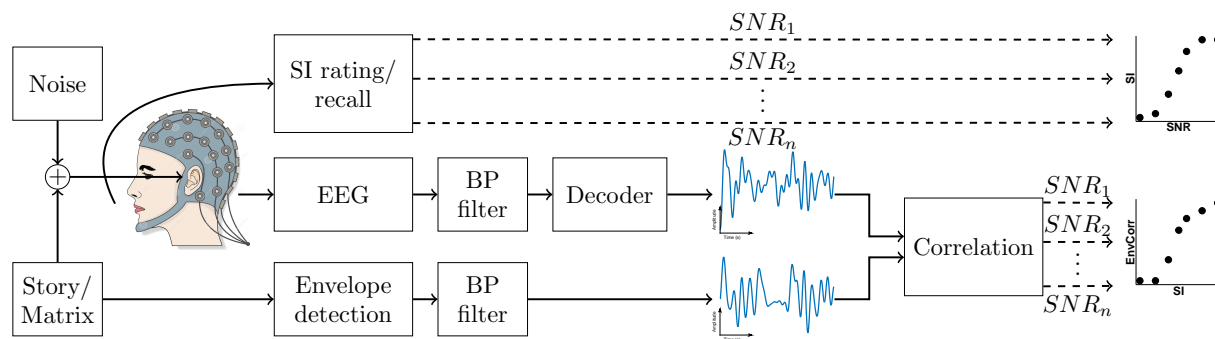

**Figure 1.** Overview of the experimental setup using the linear decoder analysis. We presented the Matrix sentences and a story at different Signal-to-Noise Ratio's (SNR). Participants listened to the speech while their EEG was measured. To obtain a measure of neural envelope tracking we correlated the reconstructed envelope with the acoustic envelope after band-pass filtering (BP filter). We compared the envelope tracking results with the behavioral speech intelligibility (SI) scores.

180 To enable reconstruction of the speech envelope from the neural data as a measure of neural  
 181 envelope tracking, a linear decoder was created using the mTRF toolbox (Lalor et al., 2006, 2009).  
 182 As speech elicits neural responses with some delay, the decoder not only attributes weights to  
 183 each EEG channel (spatial filter), but it also takes the shifted neural responses of each channel  
 184 into account (temporal filter), resulting in a matrix  $R$  containing the shifted neural responses of  
 185 each channel. If  $g$  is the linear decoder and  $R$  the shifted neural data, the reconstruction of the  
 186 speech envelope  $\hat{s}(t)$  was obtained by  $\hat{s}(t) = \sum_n \sum_{\tau} g(n, \tau) R(t + \tau, n)$  with  $t$  the time index,  $n$   
 187 ranging over the recording electrodes and  $\tau$  ranging over the integration window, i.e., the number  
 188 of post-stimulus samples used to reconstruct the envelope. The decoder was calculated by solving  
 189  $g = (RR^T)^{-1}(Rs^T)$  with  $s$  the speech envelope and applying ridge regression to prevent overfitting.  
 190 We used an integration window of 250 ms post-stimulus resulting in the decoder matrix  $g$  of 64  
 191 (EEG channels) x 33 (time delays within the integration window). The decoder was created using  
 192 the Milan story (14 minutes) without any noise.

193 As a last step the envelope was reconstructed by applying the decoder to both test stimuli,  
 194 the Matrix sentences and the natural story, at various noise levels. Each SNR trial consisted of 2

195 presentations of 80 seconds of speech (silences excluded). To measure how similar this reconstructed  
196 envelope was to the acoustic envelope as a measure for neural envelope tracking, we calculated the  
197 bootstrapped Spearman correlation using Monte Carlo sampling after removing the silences in the  
198 stimulus and the corresponding part in the EEG. Removing the silences is necessary as the Matrix  
199 sentences contain quasi-regular silent gaps between the sentences which would be a confound.

200 The significance level of the correlation was calculated by correlating random permutations of  
201 the real and reconstructed envelope 1000 times and taking percentile 2.5 and 97.5 to obtain a 95%  
202 confidence interval.

### 203 2.5.3 Temporal response function estimation

204 The analysis above integrates all neural activity over channels and time lags and requires a decoder  
205 trained on a separate story. To have a closer look at the spatiotemporal profile of the neural responses  
206 and remove the assumption that neural processing is similar for the decoder story and the test stimuli  
207 in different noise conditions, we calculated TRFs. A TRF is a linear filter that describes how the  
208 acoustic speech envelope of the stimulus is transformed into neural responses. This is the inverse  
209 approach of the previously mentioned envelope reconstruction where analysis is done from EEG to  
210 stimulus.

211 We calculated a TRF for every electrode channel in every participant. The first signal processing  
212 steps are identical to the envelope reconstruction model starting with downsampling to 1024 Hz,  
213 artefact rejection with MWF and filtering (0.5-8 Hz). Next, TRFs were calculated using the boosting  
214 algorithm (David et al., 2007; Brodbeck et al., 2018) with an l2 error norm (using the Eelbrain  
215 source code (Brodbeck, 2017)) as described in detail by David et al. (2007). After calculation, the  
216 TRFs were convolved with a rotationally symmetric Gaussian kernel of 5 samples long (SD=2). To  
217 analyze the TRFs in the time domain, we investigate the latency and amplitude of the negative and  
218 positive peaks occurring directly after the stimulus onset (Ding and Simon, 2011; Obleser and Kotz,  
219 2011; Ding and Simon, 2012; Ding et al., 2014).

## 220 2.6 Experimental setup

221 Recordings were made in a soundproof and electromagnetically shielded room. Speech was  
 222 presented bilaterally at 60 dBA and the setup was calibrated using a 2cm<sup>3</sup> coupler of the artificial  
 223 ear (Brüel & Kjær 4152, Denmark) for each stimulus. The stimuli were presented using APEX 3  
 224 (Francart et al., 2008), an RME Multiface II sound card (Germany) and Etymotic ER-3A insert  
 225 phones (Illinois, USA). First the participants did a behavioral test to measure their speech  
 226 intelligibility. Next, a 64-channel BioSemi ActiveTwo (the Netherlands) EEG recording system was  
 227 used for the EEG recordings at a sample rate of 8192 Hz. Participants sat in a comfortable chair and  
 228 were asked to move as little as possible during the recordings. We inserted a small break between  
 229 the behavioral and the EEG part and between the Matrix sentences and the story if necessary.

## 230 2.7 Statistical Analysis

231 Statistical analysis was performed using MATLAB (version R2016b) and R (version 3.3.2)  
 232 software. The significance level was set at  $\alpha=0.05$  unless otherwise stated.

233 For the behavioral tests and envelope reconstruction we compared dependent samples (e.g. test-  
 234 retest) using a nonparametric Wilcoxon signed-rank test. For every filter band and stimulus we  
 235 tested the correlation between envelope reconstruction and speech intelligibility using Spearman's  
 236 rank correlation. Next, we assessed the relationship between speech intelligibility, envelope  
 237 reconstruction, filter band and stimulus by constructing a linear mixed effect (LME) model with the  
 238 following formula:

$$239 \quad corr \sim SI + stimulus + band + SI : band + SI : stimulus + SI : band : stimulus$$

240 where *corr* is defined as the Spearman correlation between the reconstructed and the acoustic  
 241 envelope, with random effect of intercept of the participants and fixed and interaction effects of *SI*  
 242 (speech intelligibility), *stimulus* (Matrix sentences or natural story) and *band* (the delta or theta filter  
 243 band). As a control, we constructed the exact same model, but in function of SNR instead of SI.

244 To control if every chosen fixed and random effect benefited the model the Akaike Information  
245 Criterion (AIC) was calculated. The model with the lowest AIC was selected and its residual plot  
246 was analyzed to assess the normality assumption of the LME residuals. Unstandardized regression  
247 coefficients (beta) with 95% confidence intervals and p-value are reported in the results section.

248 To investigate which part of the TRF was significantly different from zero, we conducted a  
249 cluster-based permutation test. To explore significant differences between stimuli we conducted a  
250 positive and negative cluster-based analysis with a post hoc Bonferroni adjustment to correct for  
251 the positive and negative test. These tests are explained in detail by Maris and Oostenveld (2007).  
252 Spearman's rank correlation was used to investigate the possible change of amplitude and latency of  
253 the temporal-occipital peaks over time.

### 3 RESULTS

#### 254 3.1 Behavioral speech intelligibility

255 During the experiment we measured speech intelligibility behaviorally at different SNRs for every  
256 participant. Figure 2 shows that the natural story (rating method) was significantly more difficult  
257 than the Matrix sentences (recall method) ( $p < 0.001$ ,  $CI(95\%) = [15.99; 23.34]$ ,  $n=19$ , Wilcoxon  
258 signed-rank test). This indicates that the same SNR does not result in the same level of speech  
259 intelligibility for the different stimuli. To be able to compare the coherent story with the Matrix  
260 sentences, we need to account for this.

261 To check whether the used method to measure speech intelligibility, rate (story) versus recall  
262 (Matrix sentences), did not influence the results, we asked 9 of the participants to rate their speech  
263 intelligibility for the Matrix sentences, similar to the story, in addition to the standardized recall  
264 method. Comparing their rate and recall scores for the same Matrix sentences at 3 SNRs did not  
265 reveal any significant difference (-9.5 dB SNR:  $p=0.19$ ,  $CI(95\%) = [-11.50; 22.00]$ ; -6.5 dB SNR:  
266  $p=0.06$ ,  $CI(95\%) = [-29.50; 1.50]$ ; -3.5 dB SNR:  $p=0.41$ ,  $CI(95\%) = [-9.00; 2.75]$ ;  $n=9$ , Wilcoxon  
267 signed-rank test).

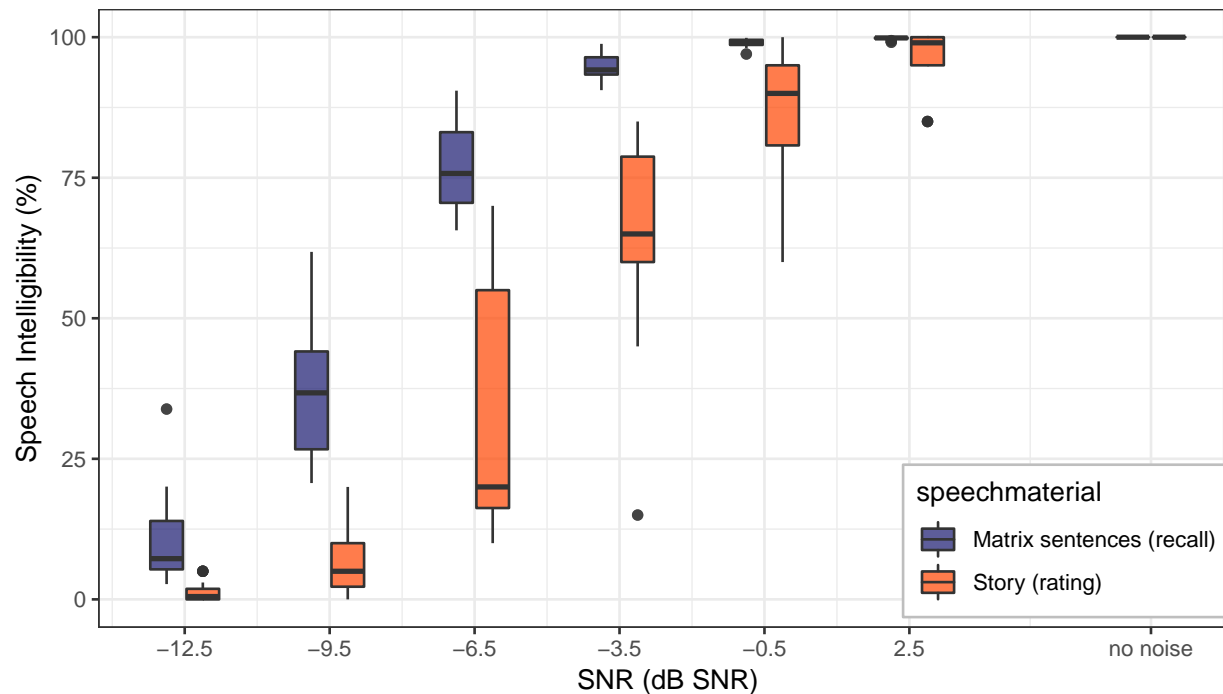

**Figure 2.** A comparison between the Matrix sentences and the story reveals that the story is more difficult to understand when adding background noise.

## 3.2 Envelope reconstruction

To measure neural envelope tracking, we calculated the Spearman correlation between the reconstructed envelope and the acoustic envelope. A test-retest analysis showed no significant difference between test and retest correlations ( $p=0.746$ ,  $CI(95\%) = [-0.004; 0.006]$ , Wilcoxon signed-rank test), therefore we averaged the correlation of the test and retest conditions resulting in one correlation per participant per SNR per stimulus. We also conducted a chance level analysis to investigate whether there is a difference in chance level between both stimuli. A difference in chance level would imply that the decoder would show a preference to one of the two stimuli. To obtain the chance level we reconstructed the envelope of the story similar to the standard analysis. Next we correlated the reconstructed envelope of each story trial with the acoustic envelope of all trials of both the story (except for the used trial) and the Matrix sentences. No significant difference was found between the chance level of the stimuli ( $p=0.534$ ,  $CI(95\%) = [-0.005; 0.003]$ , Wilcoxon

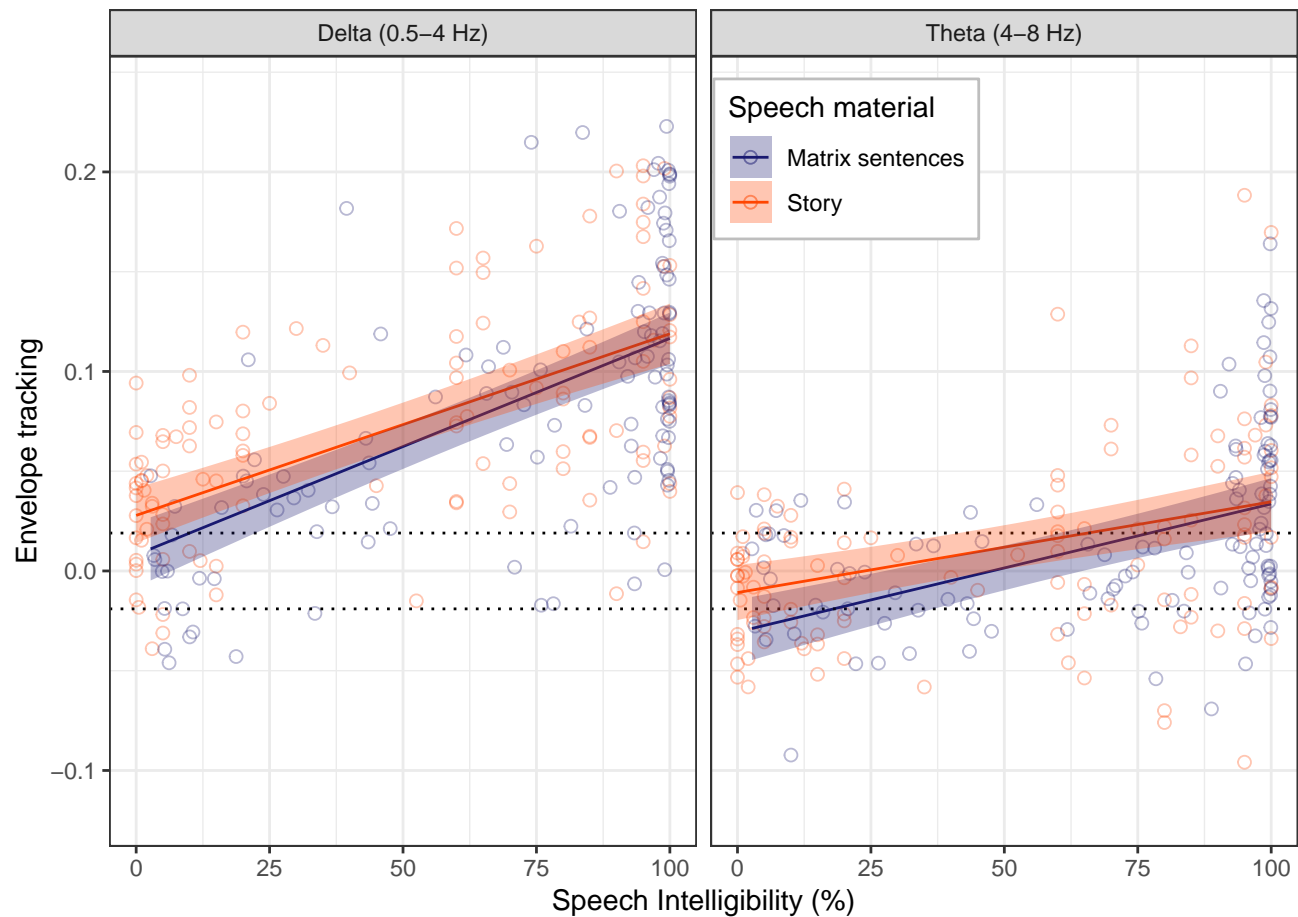

**Figure 3.** Neural envelope tracking increases with increasing speech intelligibility and by using natural speech as a stimulus. The shading represents two times the standard error of the fit and the dotted line is the significance level of the correlation ( $\pm 0.019$ ).

signed-rank test). In addition, the 95% confidence interval of the difference between the chance level of the stimuli is similar to the test-retest variability ( $CI(95\%) = [-0.005; 0.006]$ ), indicating that there is no important effect.

We analyzed neural envelope tracking in the delta (0.5–4 Hz) and the theta (4–8 Hz) band for the Matrix sentences and the natural story at various levels of speech intelligibility. Figure 3 shows that when speech intelligibility increases, the correlation between the acoustic and the reconstructed envelope, i.e. neural envelope tracking, increases for every filter band and every stimulus tested ( $p < 0.001$ , table 1, Spearman rank correlation).

288 To additionally investigate the influence of stimulus choice, we created an LME model as a  
 289 function of speech intelligibility. The analysis shows that neural envelope tracking is enhanced  
 290 for the story compared to the Matrix sentences (fixed effect stimulus,  $p=0.010$ , LME, table 2).  
 291 This enhancement does not significantly depend on the level of speech intelligibility or filter band  
 292 (interaction effect SI:stimulus,  $p=0.155$ ; interaction effect SI:band:stimulus,  $p=0.912$ ; LME, table  
 293 2). Further, neural envelope tracking in the delta band (0.5-4 Hz) is higher than in the theta band  
 294 (4-8 Hz) (fixed effect band,  $p<0.001$ , LME, table 2) with a steeper slope in the delta band (0.5-4 Hz)  
 295 (interaction effect SI:band,  $p<0.001$ , LME, table 2).

296 When conducting the same analysis using SNR as a predictor for speech intelligibility, the same  
 297 fixed and interaction effects were found to be significant as for the SI analysis (table 3). This shows  
 298 that even at the same SNR neural envelope tracking for the natural story is enhanced compared to  
 299 the Matrix sentences, making it impossible to disentangle between the effects of SNR and SI with  
 300 the current data.

### 301 **3.3 Temporal response function**

302 The analysis above integrates all different time lags and channels to obtain an optimal  
 303 reconstruction of the envelope and requires a decoder trained on a separate story. In the following  
 304 analysis we focus on how the neural responses follow the envelope in the time and spatial domain  
 305 and remove the assumption that neural processing is similar for the decoder story and the test stimuli  
 306 by investigating TRFs. TRFs were calculated on an individual level. This resulted in 868 TRFs per  
 307 participant (64 channels x 2 stimuli x 7 SNRs). To visualize topographies, we averaged the TRFs  
 308 per stimulus per SNR over participants. To investigate the time-course of the TRFs, we averaged  
 309 TRFs for a temporal-occipital channel selection (Figure 4). This selection is based on the TRF  
 310 results shown in Figure 5. A cluster-based permutation test (Maris and Oostenveld, 2007) shows the  
 311 TRF samples significantly different from zero, highlighted in bold in Figure 6.





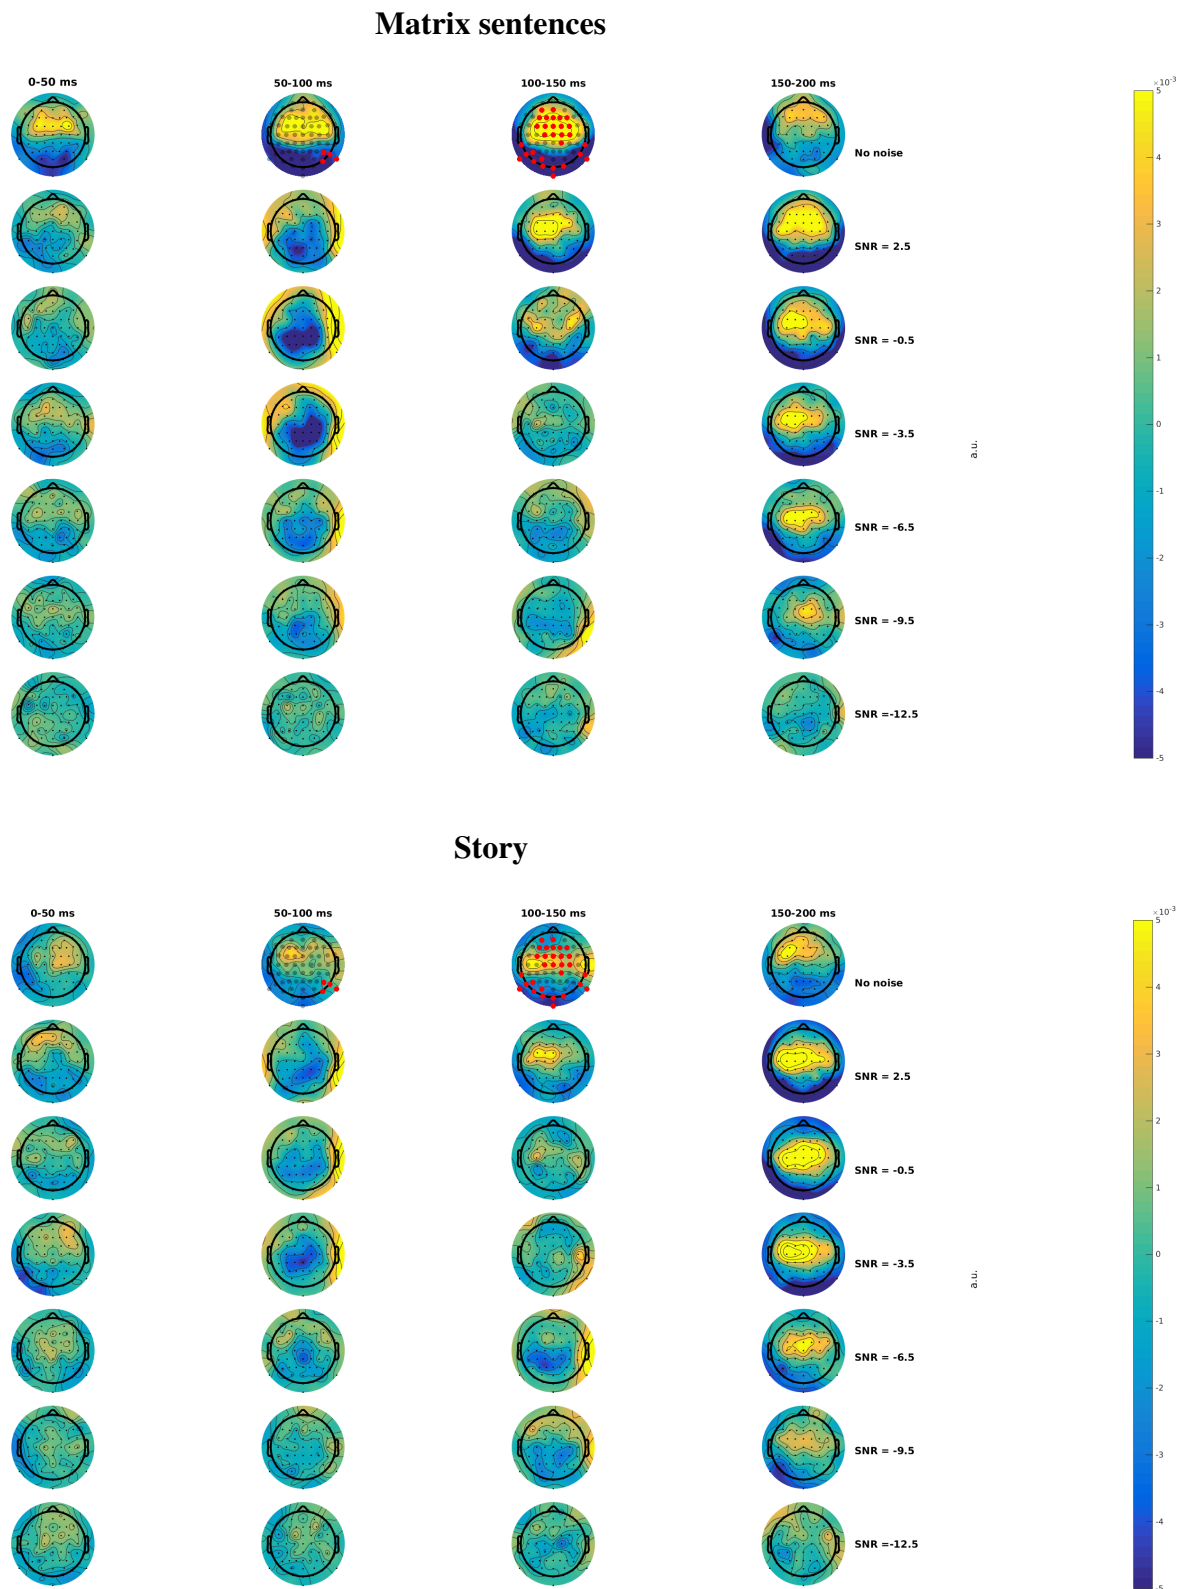

**Figure 5.** Topographies for the story and the Matrix sentences at different SNRs and different time lags varying from 0 until 200 ms. Significant differences between the Matrix sentences and the story are highlighted in red.

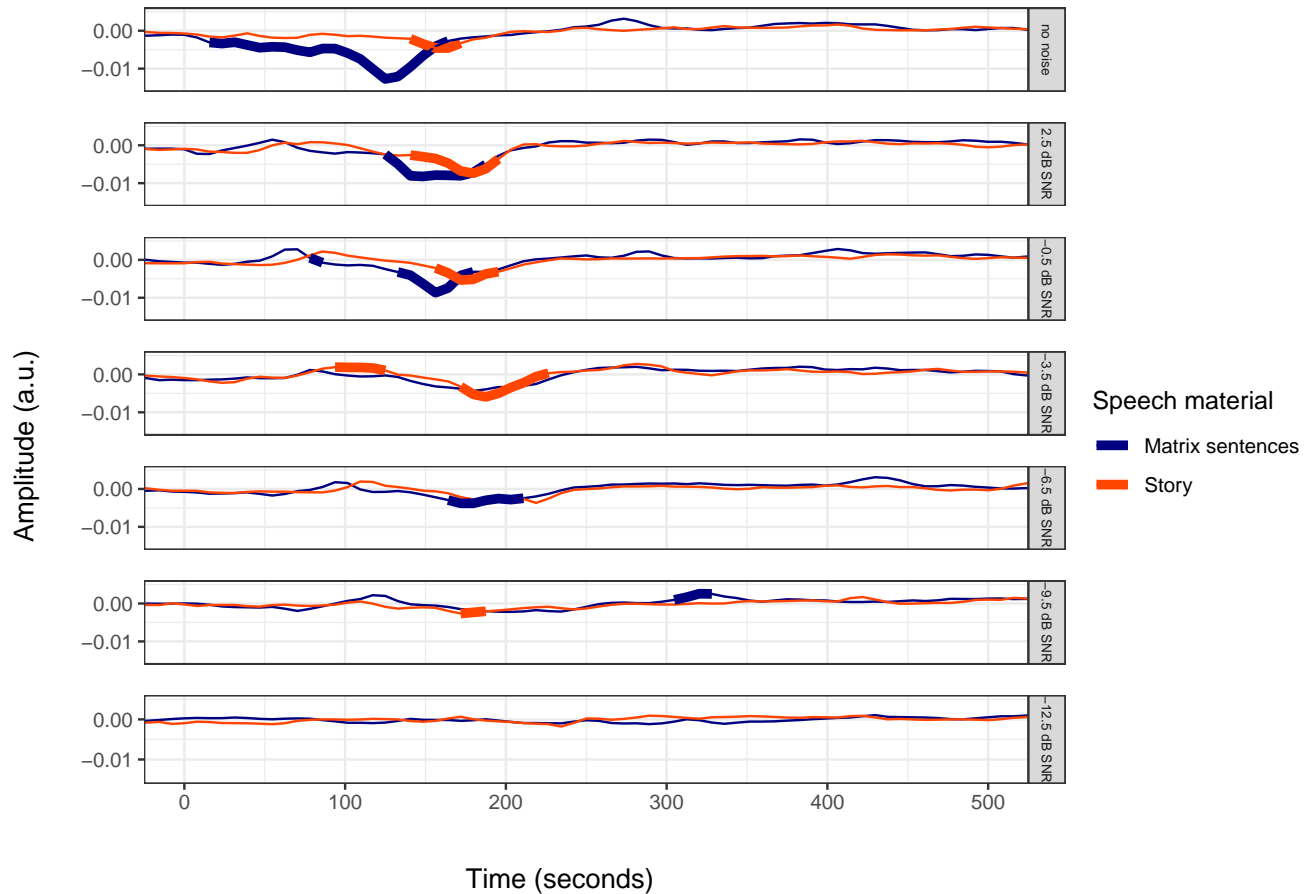

**Figure 6.** Time-course of the temporal-occipital TRFs over participants for the Matrix sentences and the story. TRF samples significantly different from zero are highlighted in bold.

327 a negative peak can be found. Figure 7 shows the latency and amplitude results of this peak on a  
 328 participant level over speech intelligibility. It was determined individually by selecting the most  
 329 negative amplitude of the TRF between 50 and 300 ms. With decreasing speech intelligibility  
 330 the amplitude of the negative peak per participant decreases for both stimuli (Matrix sentences:  
 331 Spearman rank correlation=0.49,  $p<0.001$ ; Story: Spearman rank correlation=0.26,  $p=0.005$ ).

### 332 3.3.2 Effect of stimulus type on TRF

333 Besides the decreasing amplitude, latency also decreases for the Matrix sentences with decreasing  
 334 speech intelligibility (Spearman rank correlation=0.46,  $p<0.001$ ). For the natural story, on the other

hand, latency is not significantly related to speech intelligibility (Spearman rank correlation=0.02,  $p=0.835$ )).

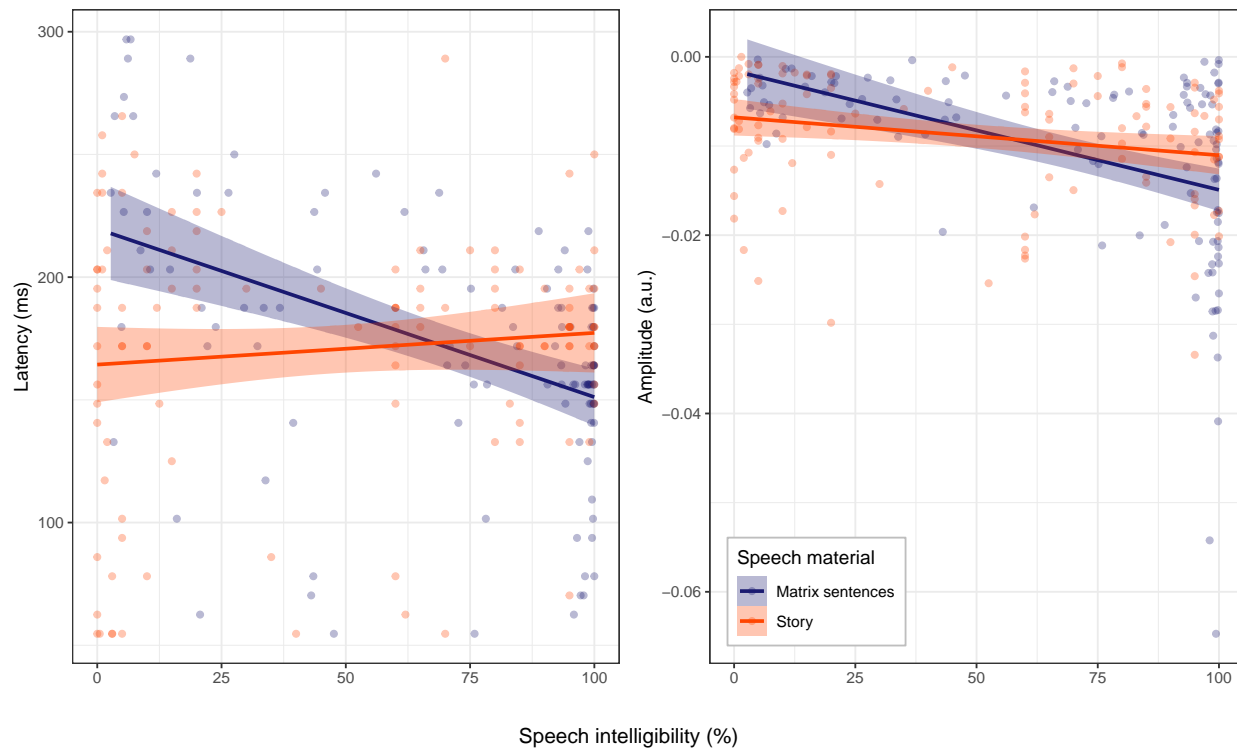

**Figure 7.** Latency and amplitude of the negative peak of the temporal-occipital TRF between 50 and 300 ms per participant over speech intelligibility.

Next to the difference between the Matrix sentences and the story concerning latency changes, other stimulus dependent differences can be found. First, a positive and negative cluster analysis (Maris and Oostenveld, 2007) over all participants revealed significant differences ( $\alpha=0.025$ ) between both stimuli in the no-noise condition with larger amplitudes for the Matrix sentences in the central and parieto-occipital channels, highlighted in red in Figure 5. In contrast to this stimuli driven difference in the no-noise condition, no significant differences between both stimuli could be found in the presence of background noise. Second, in addition to the prominent negative peak between 100 and 200 ms, a positive significant peak arises around 300 ms for the Matrix sentences at -9.5 dB SNR (Figure 6), while this is not the case for the story.

## 4 DISCUSSION

In this study we investigated whether the objective measure of speech intelligibility by Vanthornhout et al. (2018) using Matrix sentences can also be conducted with natural speech as this would be beneficial for clinical applications. To that end, we tested 19 normal-hearing participants. They listened to both the Matrix sentences and a natural story at varying levels of speech intelligibility while their EEG was recorded. We found that it is feasible to use natural speech as a stimulus for the objective measure of speech intelligibility and that noise and the stimulus type can change the temporal characteristics of the brain responses over the scalp.

### 4.1 The same SNR does not result in similar speech intelligibility for different stimuli

As a first step we measured speech intelligibility behaviorally for both stimuli at different noise levels. The results show that the same SNR does not result in similar speech intelligibility for the different stimuli. The story was found to be more difficult to understand than Matrix sentences. Although we controlled for the sex of the speaker and chose stimuli with similar speech rates and spectrum, the difference could still be due to different acoustic features such as for example prosody. The Matrix sentences namely are part of a standardized speech material where every word is spoken at the same intensity. The story, on the other hand, is narrated for children and has more variations. An additional reason to explain this difference is lexical prediction. Even though the permutations of the words are different in each Matrix sentence, the words themselves are all equally likely and familiar to the participants, in contrast to the story. Perhaps drawing from a larger pool of words for the Matrix sentences might have led to more similar intelligibility ratings between stimuli. Finally, speech intelligibility for both stimuli was measured in a different way: rating (story) versus recall (Matrix sentences). Similar to the rating and recall results for the Matrix sentences of Decruy et al. (2018), we did not find a statistical difference between both measuring methods applied on the same Matrix sentences.

## 370 **4.2 Neural envelope tracking as an objective measure of speech intelligibility**

371 We found that the correlation between the reconstructed and the acoustic envelope increased with  
 372 speech intelligibility for both the Matrix sentences and the story. This supports the results of Luo  
 373 and Poeppel (2007); Ding and Simon (2013); Ding et al. (2014); Molinaro and Lizarazu (2017);  
 374 Vanthornhout et al. (2018); Lotzov and Parra (2019) where an increase in speech intelligibility  
 375 was also found to accompany an increase in envelope tracking and demonstrates that the objective  
 376 measure of speech intelligibility using Matrix sentences by Vanthornhout et al. (2018) can be  
 377 conducted with fully natural speech.

378 Next, the tracking results in the delta band were significantly higher than in the theta band while  
 379 the significance levels remain the same, resulting in a steeper slope of envelope tracking as a  
 380 function of speech intelligibility in the delta band. This difference in correlation magnitude between  
 381 the frequency bands could be explained by the fact that the modulation spectrum of both stimuli has  
 382 most energy in the delta band (Luo and Poeppel, 2007; Aiken and Picton, 2008).

383 When investigating the differences between both stimuli, we found that the use of natural speech  
 384 enhanced neural envelope tracking compared to Matrix sentences. This suggests that neural envelope  
 385 tracking might capture the interaction between the incoming acoustic speech stream and top-down  
 386 information (Hickok and Poeppel, 2007; Gross et al., 2013) such as for example semantic processing  
 387 (Di Liberto et al., 2018; Broderick et al., 2018). A potential confound is that we used different SNRs  
 388 for the two stimulus types (to control for intelligibility). This means that the differences in envelope  
 389 tracking could be related simply to SNR rather than other stimulus properties. To investigate this,  
 390 we conducted the same analysis, but with SNR as predictor instead of intelligibility, and again found  
 391 significantly increased envelope tracking for the story stimulus. This shows that SNR by itself does  
 392 not account for the full difference between the two stimulus types. However, apart from different  
 393 SNRs, other confounding factors could be present where we cannot control for. First, although the  
 394 acoustics of the stimuli were matched in terms of sex and speech rate of the speaker and spectrum  
 395 of the stimulus, acoustic differences like prosody are still present, as discussed in paragraph 4.1.

Second, despite the questions asked to motivate the participants, the reduced correlations for the Matrix sentences could be linked to attention. Because listening to concatenated sentences can be boring, attention loss could occur which reduces neural envelope tracking (Ding and Simon, 2012; Kong et al., 2014; Petersen et al., 2017; Vanthornhout et al., 2019). For the natural story, on the other hand, attention could be less of an issue as attending this speech is entertaining possibly resulting in higher correlations.

### 4.3 The effect of noise and stimulus type on neural envelope tracking

In addition to envelope reconstruction to show the feasibility of natural speech as a stimulus for the objective measure (4.2), we conducted a TRF analysis. This analysis enables us to investigate the temporal characteristics of the brain responses over the entire scalp and removes the assumption that neural processing is similar for the decoder story and the test stimuli. The topographies in Figure 5 of both stimuli show a negative activation in the temporal-occipital channels and positive activation in the central channels. This is a typical topography of auditory evoked far-field potentials (Picton, 2011). The large negative peak within the 100 to 200 ms time lag (Figure 6) could be the so-called N100, usually occurring at a latency between 70-150 ms (Picton, 2011).

#### 4.3.1 Effect of SNR and speech intelligibility on TRFs

Generally we found, similar to envelope reconstruction, high TRF amplitudes over the entire scalp when speech intelligibility is high (SI=100%) and reduced amplitudes when speech intelligibility decreased for both stimuli, again showing feasibility of natural speech as a stimulus for the objective measure of speech intelligibility. Most remarkable are the TRF amplitudes between 150 to 200 ms, which consistently decrease with decreasing speech intelligibility, perhaps indicating a time window sensitive to speech intelligibility. Another peculiarity are the noise induced topographic changes. When a small amount of noise is added and speech intelligibility remains almost unchanged from the no-noise condition (SNR=2.5 dB SNR; Matrix sentences: SI=99.9%; Story: SI=99.0%), TRF amplitudes across the entire scalp decrease between 0 to 150 ms, while amplitudes between 150 to 200 ms increase. Moreover, TRF amplitudes between 50 and 100 ms even switch polarities in the



422 presence of noise. These results possibly reveal noise induced changes related to enhanced attention  
423 and listening effort (Ding and Simon, 2012; Kong et al., 2014; Petersen et al., 2017; Obleser and  
424 Kotz, 2011).

#### 425 4.3.2 Effect of stimulus type on TRFs

426 Stimulus related differences can be found when comparing topography results between both  
427 stimuli. TRF amplitudes are larger for the Matrix sentences in the central and parieto-occipital  
428 channels compared to the story in the no-noise condition. In the presence of background noise,  
429 even at a very high SNR, no significant difference can be found anymore. A possible hypothesis  
430 could be the interaction between the incoming acoustic speech stream and top-down information  
431 (Hickok and Poeppel, 2007; Gross et al., 2013): In the no-noise condition Matrix sentences are  
432 mainly processed in a feed-forward acoustical way. The enhanced TRF amplitudes could be caused  
433 by the fixed syntactical 5-word structure of the Matrix sentences, resulting in a more rigid word  
434 and sentence rate compared to the story. However, when noise is added, more effort has to be paid  
435 to listen to the Matrix sentences. This changes listening to the Matrix sentences from a bottom-up  
436 process to an interactive bottom-up and top-down process similar to the story, diminishing the  
437 differences between both stimuli.

438 Another stimulus related difference is the latency pattern over speech intelligibility. The latency  
439 of the N100 peak decreases with increasing speech intelligibility for the Matrix sentences, while the  
440 latency remains unchanged for the story. A latency decrease with increasing speech intelligibility,  
441 similar to the Matrix sentences, has been reported in literature by Petersen et al. (2017) and Kong  
442 et al. (2014), but is not supported by Ding and Simon (2012). This different pattern between the  
443 Matrix sentences and the story could be explained by two factors. (1) Top-down processing: This  
444 is present for the story the entire time, for the Matrix sentences, on the other hand, it increases  
445 with increasing noise level. Top-down processing requires more time, which could result in delayed  
446 TRFs. (2) Attention: Listening to concatenated Matrix sentences might be boring, especially when  
447 speech intelligibility decreases, which could result in attention loss and less listening effort known



448 to delay neural processing of speech (Ding and Simon, 2012; Kong et al., 2014; Petersen et al.,  
449 2017; Vanthornhout et al., 2019).

450 A last result to point out is the positive peak around 300 ms for the Matrix sentences at -9.5 dB SNR  
451 (SI=49%) (Figure 6). P300 can occur when a participant tries to detect a target stimulus (Picton,  
452 1992, 2011). As the Matrix sentences do not contain semantic context, which makes content  
453 questions not possible, counting questions were asked at every SNR trial, for example, 'Which  
454 colors of boats were mentioned?'. We hypothesize that the question type, content questions for the  
455 story versus counting questions for the Matrix sentences, accounts for this P300 difference. As a  
456 consequence, the type of questions to ask is also an important factor to take into account for future  
457 research.

#### 458 **4.4 Implications for the objective measure of speech intelligibility**

459 In this study we showed that the objective measure of speech intelligibility by Vanthornhout  
460 et al. (2018) using Matrix sentences can also be conducted with natural speech as a stimulus. This  
461 paves the way towards intelligibility measurements of any speech fragment, which is impossible  
462 today using behavioral measurements but may relate better to everyday communication and would  
463 be beneficial for clinical applications. In addition, we found an enhancement in neural envelope  
464 tracking when using natural speech as a stimulus instead of Matrix sentences. This suggests that  
465 neural envelope tracking might reflect the integration of incoming acoustic features and top-down  
466 information, which indicates that the choice of the stimulus has to be considered based on the  
467 intended purpose of the measurement. To conduct research, for example, and investigate neural  
468 speech processing in noise, a story could be an interesting choice as neural envelope tracking is more  
469 pronounced because of better sustained attention, more listening effort and/or semantic processing.  
470 However, when comparing speech intelligibility outcomes in a clinical setting, for example to fit  
471 hearing aids, top-down processing effects are undesired and should be ruled out and the Matrix  
472 sentences could be used instead.

## 473 **4.5 Conclusion**

474 We found increasing neural envelope tracking with increasing speech intelligibility for both  
 475 stimuli with an additional enhancement for natural speech compared to Matrix sentences. These  
 476 results show (1) the feasibility of natural speech as a stimulus for the objective measure of speech  
 477 intelligibility, (2) that neural envelope tracking is enhanced using a story compared to Matrix  
 478 sentences and (3) that noise and the stimulus type can change the temporal characteristics of the  
 479 brain responses.

**Table 1.** Spearman rank correlation between neural envelope tracking and speech understanding

| Speechmaterial   | Filter band      | Correlation | p-value |
|------------------|------------------|-------------|---------|
| Matrix sentences | Delta (0.5-4 Hz) | 0.62        | p<0.001 |
| Natural story    | Delta (0.5-4 Hz) | 0.59        | p<0.001 |
| Matrix sentences | Theta (4-8 Hz)   | 0.46        | p<0.001 |
| Natural story    | Theta (4-8 Hz)   | 0.41        | p<0.001 |

**Table 2.** Linear Mixed Effect Model of envelope reconstruction in function of SI

| Linear mixed effect model (factor)  | beta value             | CI(95%)                   | p-value |
|-------------------------------------|------------------------|---------------------------|---------|
| Fixed effect SI                     | $1.08 \times 10^{-3}$  | $\pm 1.90 \times 10^{-4}$ | p<0.001 |
| Fixed effect stimulus               | $1.97 \times 10^{-2}$  | $\pm 1.49 \times 10^{-2}$ | p=0.010 |
| Fixed effect band                   | $-3.87 \times 10^{-2}$ | $\pm 1.41 \times 10^{-2}$ | p<0.001 |
| Interaction effect SI:stimulus      | $-1.74 \times 10^{-4}$ | $\pm 2.39 \times 10^{-4}$ | p=0.155 |
| Interaction effect SI:band          | $-4.43 \times 10^{-4}$ | $\pm 2.14 \times 10^{-4}$ | p<0.001 |
| Interaction effect SI:band:stimulus | $-1.28 \times 10^{-5}$ | $\pm 2.25 \times 10^{-4}$ | p=0.912 |

Speech Intelligibility (SI), Confidence Interval (CI)

**Table 3.** Linear Mixed Effect Model of envelope reconstruction in function of SNR

| Linear mixed effect model (factor)   | beta value             | CI(95%)                   | p-value     |
|--------------------------------------|------------------------|---------------------------|-------------|
| Fixed effect SNR                     | $7.75 \times 10^{-3}$  | $\pm 1.39 \times 10^{-3}$ | $p < 0.001$ |
| Fixed effect stimulus                | $-1.25 \times 10^{-2}$ | $\pm 1.06 \times 10^{-2}$ | $p = 0.022$ |
| Fixed effect band                    | $-8.10 \times 10^{-2}$ | $\pm 1.06 \times 10^{-2}$ | $p < 0.001$ |
| Interaction effect SNR:stimulus      | $-1.01 \times 10^{-3}$ | $\pm 1.83 \times 10^{-3}$ | $p = 0.284$ |
| Interaction effect SNR:band          | $-3.20 \times 10^{-3}$ | $\pm 1.83 \times 10^{-3}$ | $p < 0.001$ |
| Interaction effect SNR:band:stimulus | $-1.40 \times 10^{-6}$ | $\pm 2.13 \times 10^{-3}$ | $p = 0.999$ |

Speech-to-Noise Ratio (SNR), Confidence Interval (CI)

## 480 **Acknowledgements**

481 The authors would like to thank Lien Decruy and Elie Vanluydt for their help in data acquisition.  
 482 All authors designed the experiment, contributed to the data analysis, discussed the results and  
 483 implications and commented on the manuscript at all stages. E.V. performed the experiments and  
 484 wrote the paper. This project has received funding from the European Research Council (ERC)  
 485 under the European Union's Horizon 2020 research and innovation programme (grant agreement  
 486 No 637424 to Tom Francart). Further support came from KU Leuven Special Research Fund under  
 487 grant OT/14/119. Research of Jonas Vanthornhout (1S10416N) and Eline Verschueren (1S86118N)  
 488 is funded by a PhD grant of the Research Foundation Flanders (FWO). The authors declare no  
 489 conflict of interest.

## **REFERENCES**

- 490 Aiken, S. J. and Picton, T. W. (2008). Human Cortical Responses to the Speech Envelope. *Ear &*  
 491 *Hearing* 29, 139–157
- 492 Anderson, A. J., Broderick, M. P., and Lalor, E. C. (2018). Neuroscience: Great Expectations at the  
 493 Speech–Language Interface. *Current Biology* 28, R1396–R1398. doi:10.1016/j.cub.2018.10.063
- 494 Biesmans, W., Das, N., Francart, T., and Bertrand, A. (2017). Auditory-inspired speech envelope  
 495 extraction methods for improved EEG-based auditory attention detection in a cocktail party  
 496 scenario. *IEEE Transactions on Neural Systems and Rehabilitation Engineering* 25, 402–412.  
 497 doi:10.1109/TNSRE.2016.2571900
- 498 Brodbeck, C. (2017). Eelbrain: 0.25. Zenodo. doi:10.5281/zenodo.1186450
- 499 Brodbeck, C., Presacco, A., and Simon, J. Z. (2018). Neural source dynamics of brain responses  
 500 to continuous stimuli: Speech processing from acoustics to comprehension. *NeuroImage* 172,  
 501 162–174. doi:10.1016/j.neuroimage.2018.01.042
- 502 Broderick, M. P., Anderson, A. J., Liberto, G. M. D., et al. (2018). Electrophysiological correlates  
 503 of semantic dissimilarity reflect the comprehension of natural , narrative speech . *Current Biology*  
 504 28, 803–809

David, S. V., Mesgarani, N., and Shamma, S. A. (2007). Estimating sparse spectro-temporal receptive fields with natural stimuli. *Network: Computation in Neural Systems* 18, 191–212. doi:10.1080/09548980701609235

Decruy, L., Das, N., Verschueren, E., and Francart, T. (2018). The self-assessed Békésy procedure: validation of a method to measure intelligibility of connected discourse. *Trends in Hearing* 22, 1–13. doi:10.1177/2331216518802702

Di Liberto, G. M., Lalor, E. C., and Millman, R. E. (2018). Causal cortical dynamics of a predictive enhancement of speech intelligibility. *NeuroImage* 166, 247–258. doi:10.1016/j.neuroimage.2017.10.066

Ding, N., Chatterjee, M., and Simon, J. Z. (2014). Robust cortical entrainment to the speech envelope relies on the spectro-temporal fine structure. *NeuroImage* 88, 41–46. doi:10.1016/j.neuroimage.2013.10.054

Ding, N. and Simon, J. Z. (2011). Neural coding of continuous speech in auditory cortex during monaural and dichotic listening. *Journal of Neurophysiology* 107, 78–89. doi:10.1152/jn.00297.2011

Ding, N. and Simon, J. Z. (2012). Emergence of neural encoding of auditory objects while listening to competing speakers. *Proceedings of the National Academy of Sciences of the United States of America* 109, 11854–9. doi:10.1073/pnas.1205381109

Ding, N. and Simon, J. Z. (2013). Adaptive Temporal Encoding Leads to a Background-Insensitive Cortical Representation of Speech. *Journal of Neuroscience* 33, 5728–5735. doi:10.1523/JNEUROSCI.5297-12.2013

Francart, T., van Wieringen, A., and Wouters, J. (2008). APEX 3: a multi-purpose test platform for auditory psychophysical experiments. *Journal of Neuroscience Methods* 172, 283–293. doi:http://dx.doi.org/10.1016/j.jneumeth.2008.04.020

Gross, J., Hoogenboom, N., Thut, G., et al. (2013). Speech rhythms and multiplexed oscillatory sensory coding in the human brain. *PLoS biology* 11, e1001752. doi:10.1371/journal.pbio.1001752

532 Hickok, G. and Poeppel, D. (2007). The cortical organization of speech processing. *Nature reviews.*  
533 *Neuroscience* 8, 393–402. doi:10.1038/nrn2113

534 Kerlin, J. R., Shahin, A. J., and Miller, L. M. (2010). Attentional gain control of ongoing cortical  
535 speech representations in a "cocktail party". *The Journal of neuroscience : the official journal of*  
536 *the Society for Neuroscience* 30, 620–8. doi:10.1523/JNEUROSCI.3631-09.2010

537 Kong, Y.-Y., Mullangi, A., and Ding, N. (2014). Differential modulation of auditory responses to  
538 attended and unattended speech in different listening conditions. *Hearing Research* 0, 73–81.  
539 doi:10.1002/ana.22528.Toll-like

540 Lalor, E. C., Pearlmutter, B. A., Reilly, R. B., et al. (2006). The VESPA: A method for the rapid  
541 estimation of a visual evoked potential. *NeuroImage* 32, 1549–1561. doi:10.1016/j.neuroimage.  
542 2006.05.054

543 Lalor, E. C., Power, A. J., Reilly, R. B., and Foxe, J. J. (2009). Resolving Precise  
544 Temporal Processing Properties of the Auditory System Using Continuous Stimuli. *Journal of*  
545 *Neurophysiology* 102, 349–359. doi:10.1152/jn.90896.2008

546 Lesenfants, D., Vanthornhout, J., Verschueren, E., et al. (2019). Predicting individual speech  
547 intelligibility from the neural tracking of acoustic- and phonetic-level speech representations.  
548 *bioRxiv* doi:<https://doi.org/10.1101/471367>

549 Lotzov, I. and Parra, L. (2019). EEG can predict speech intelligibility To. *J. Neural Eng.* , in press  
550 <https://doi.org/10.1088/1741-2552/ab07fe>

551 Luo, H. and Poeppel, D. (2007). Phase patterns of neuronal responses reliably discriminate speech  
552 in human auditory cortex. *Neuron* 54, 1001–10. doi:10.1016/j.neuron.2007.06.004

553 Maris, E. and Oostenveld, R. (2007). Nonparametric statistical testing of EEG- and MEG-data.  
554 *Journal of Neuroscience Methods* 164, 177–190. doi:10.1016/j.jneumeth.2007.03.024

555 Mesgarani, N. and Chang, E. F. (2012). Selective cortical representation of attended speaker in  
556 multi-talker speech perception. *Nature* 485, 233–6. doi:10.1038/nature11020

557 Millman, R. E., Johnson, S. R., and Prendergast, G. (2015). The Role of Phase-locking to the  
558 Temporal Envelope of Speech in Auditory Perception and Speech Intelligibility. *Journal of*

559 *Cognitive Neuroscience* 27, 533–545. doi:10.1162/jocn

560 Molinaro, N. and Lizarazu, M. (2017). Delta(but not theta)-band cortical entrainment involves  
561 speech-specific processing. *European Journal of Neuroscience* 9, 1–9. doi:10.1111/ejn.13811

562 Obleser, J. and Kotz, S. A. (2011). Multiple brain signatures of integration in the comprehension of  
563 degraded speech. *NeuroImage* 55, 713–723. doi:10.1016/j.neuroimage.2010.12.020

564 Petersen, E. B., Wöstmann, M., Obleser, J., and Lunner, T. (2017). Neural tracking of attended  
565 versus ignored speech is differentially affected by hearing loss. *Journal of Neurophysiology* 117,  
566 18–27. doi:10.1152/jn.00527.2016

567 Picton, T. W. (1992). The P300 Wave of the Human Event-Related Potential. *Journal of clinical*  
568 *Neurpohisiology* 9, 456–479

569 Picton, T. W. (2011). *Human Auditory Evoked Potentials* (San Diego: Plural Publishing inc.)

570 Shannon, R. V., Zeng, F.-G., Kamath, V., et al. (1995). Speech Recognition with Primarily Temporal  
571 Cues. *Science* 270, 303–304. doi:10.1126/science.270.5234.303

572 Somers, B., Francart, T., and Bertrand, A. (2018). A generic EEG artifact removal algorithm based  
573 on the multi-channel Wiener filter. *Journal of neural engineering* 15. doi:10.1088/1741-2552/  
574 aaac92

575 Vanthornhout, J., Decruy, L., and Francart, T. (2019). Effect of task and attention on neural tracking  
576 of speech. *BioRxiv* , doi: <http://dx.doi.org/10.1101/568204>doi:10.3389/fpsyg.2019.00449

577 Vanthornhout, J., Decruy, L., Wouters, J., et al. (2018). Speech intelligibility predicted from neural  
578 entrainment of the speech envelope. *JARO* 19, 181–191
